# Supplementary material
Source: PubMed Central journal article supplement (PMC2864578)
Supplement: NIHMS195362-supplement-1.pdf [file NIHMS195362-supplement-1.pdf]

## Supplementary Material

Fullerton et al.

Population Description and its Role in the Interpretation of Genetic Association

### **80 articles reporting associations involving the Pro12Ala variant of PPAR $\gamma$ (1997-2005)**

Adamo KB, Sigal RJ, Williams K, Kenny G, Prud'homme D, Tesson F. Influence of Pro12Ala peroxisome proliferator-activated receptor gamma2 polymorphism on glucose response to exercise training in type 2 diabetes. *Diabetologia*. 2005 Aug;48(8):1503-9. Epub 2005 Jun 29.

Ahluwalia M, Evans M, Morris K, Currie C, Davies S, Rees A, Thomas A. The influence of the Pro12Ala mutation of the PPAR-gamma receptor gene on metabolic and clinical characteristics in treatment-naïve patients with type 2 diabetes. *Diabetes Obes Metab*. 2002 Nov;4(6):376-8.

Al-Shali KZ, House AA, Hanley AJ, Khan HM, Harris SB, Zinman B, Mamakeesick M, Fenster A, Spence JD, Hegele RA. Genetic variation in PPARG encoding peroxisome proliferator-activated receptor gamma associated with carotid atherosclerosis. *Stroke*. 2004 Sep;35(9):2036-40. Epub 2004 Jul 29.

Altshuler D, Hirschhorn JN, Klannemark M, Lindgren CM, Vohl MC, Nemesh J, Lane CR, Schaffner SF, Bolk S, Brewer C, Tuomi T, Gaudet D, Hudson TJ, Daly M, Groop L, Lander ES. The common PPARgamma Pro12Ala polymorphism is associated with decreased risk of type 2 diabetes. *Nat Genet*. 2000 Sep;26(1):76-80.

Andrulionytė L, Zacharova J, Chiasson JL, Laakso M; STOP-NIDDM Study Group. Common polymorphisms of the PPAR-gamma2 (Pro12Ala) and PGC-1alpha (Gly482Ser) genes

- are associated with the conversion from impaired glucose tolerance to type 2 diabetes in the STOP-NIDDM trial. *Diabetologia*. 2004 Dec;47(12):2176-84. Epub 2004 Dec 8.
- Beamer BA, Yen CJ, Andersen RE, Muller D, Elahi D, Cheskin LJ, Andres R, Roth J, Shuldiner AR. Association of the Pro12Ala variant in the peroxisome proliferator-activated receptor-gamma2 gene with obesity in two Caucasian populations. *Diabetes*. 1998 Nov;47(11):1806-8.
- Blüher M, Paschke R. Analysis of the relationship between PPAR-gamma 2 gene variants and severe insulin resistance in obese patients with impaired glucose tolerance. *Exp Clin Endocrinol Diabetes*. 2003 Apr;111(2):85-90.
- Bulotta A, Ludovico O, Coco A, Di Paola R, Quattrone A, Carella M, Pellegrini F, Prudente S, Trischitta V. The common -866G/A polymorphism in the promoter region of the UCP-2 gene is associated with reduced risk of type 2 diabetes in Caucasians from Italy. *J Clin Endocrinol Metab*. 2005 Feb;90(2):1176-80. Epub 2004 Nov 23.
- Buzzetti R, Petrone A, Caiazzo AM, Alemanno I, Zavarella S, Capizzi M, Mein CA, Osborn JA, Vania A, di Mario U. PPAR-gamma2 Pro12Ala variant is associated with greater insulin sensitivity in childhood obesity. *Pediatr Res*. 2005 Jan;57(1):138-40. Epub 2004 Nov 5.
- Buzzetti R, Petrone A, Ribaud MC, Alemanno I, Zavarella S, Mein CA, Maiani F, Tiberti C, Baroni MG, Vecci E, Arca M, Leonetti F, Di Mario U. The common PPAR-gamma2 Pro12Ala variant is associated with greater insulin sensitivity. *Eur J Hum Genet*. 2004 Dec;12(12):1050-4.
- Cho YM, Ritchie MD, Moore JH, Park JY, Lee KU, Shin HD, Lee HK, Park KS. Multifactor-dimensionality reduction shows a two-locus interaction associated with Type 2 diabetes mellitus. *Diabetologia*. 2004 Mar;47(3):549-54. Epub 2004 Jan 17.

- Chuang LM, Hsiung CA, Chen YD, Ho LT, Sheu WH, Pei D, Nakatsuka CH, Cox D, Pratt RE, Lei HH, Tai TY. Sibling-based association study of the PPARgamma2 Pro12Ala polymorphism and metabolic variables in Chinese and Japanese hypertension families: a SAPPHIRe study. Stanford Asian-Pacific Program in Hypertension and Insulin Resistance. *J Mol Med.* 2001 Nov;79(11):656-64.
- Clement K, Hercberg S, Passinge B, Galan P, Varroud-Vial M, Shuldiner AR, Beamer BA, Charpentier G, Guy-Grand B, Froguel P, Vaisse C. The Pro115Gln and Pro12Ala PPAR gamma gene mutations in obesity and type 2 diabetes. *Int J Obes Relat Metab Disord.* 2000 Mar;24(3):391-3.
- Cole SA, Mitchell BD, Hsueh WC, Pineda P, Beamer BA, Shuldiner AR, Comuzzie AG, Blangero J, Hixson JE. The Pro12Ala variant of peroxisome proliferator-activated receptor-gamma2 (PPAR-gamma2) is associated with measures of obesity in Mexican Americans. *Int J Obes Relat Metab Disord.* 2000 Apr;24(4):522-4.
- Danawati CW, Nagata M, Moriyama H, Hara K, Yasuda H, Nakayama M, Kotani R, Yamada K, Sakata M, Kurohara M, Wiyono P, Asdie H, Sakaue M, Taniguchi H, Yokono K. A possible association of Pro12Ala polymorphism in peroxisome proliferator-activated receptor gamma2 gene with obesity in native Javanese in Indonesia. *Diabetes Metab Res Rev.* 2005 Sep-Oct;21(5):465-9.
- Deeb SS, Fajas L, Nemoto M, Pihlajamäki J, Mykkänen L, Kuusisto J, Laakso M, Fujimoto W, Auwerx J. A Pro12Ala substitution in PPARgamma2 associated with decreased receptor activity, lower body mass index and improved insulin sensitivity. *Nat Genet.* 1998 Nov;20(3):284-7.

- Doney A, Fischer B, Frew D, Cumming A, Flavell DM, World M, Montgomery HE, Boyle D, Morris A, Palmer CN. Haplotype analysis of the PPARgamma Pro12Ala and C1431T variants reveals opposing associations with body weight. *BMC Genet.* 2002 Nov 13;3:21. Epub 2002 Nov 13.
- Doney AS, Fischer B, Cecil JE, Boylan K, McGuigan FE, Ralston SH, Morris AD, Palmer CN. Association of the Pro12Ala and C1431T variants of PPARG and their haplotypes with susceptibility to Type 2 diabetes. *Diabetologia.* 2004 Mar;47(3):555-8. Epub 2004 Jan 17.
- Douglas JA, Erdos MR, Watanabe RM, Braun A, Johnston CL, Oeth P, Mohlke KL, Valle TT, Ehnholm C, Buchanan TA, Bergman RN, Collins FS, Boehnke M, Tuomilehto J. The peroxisome proliferator-activated receptor-gamma2 Pro12A1a variant: association with type 2 diabetes and trait differences. *Diabetes.* 2001 Apr;50(4):886-90.
- Ek J, Urhammer SA, Sørensen TI, Andersen T, Auwerx J, Pedersen O. Homozygosity of the Pro12Ala variant of the peroxisome proliferation-activated receptor-gamma2 (PPAR-gamma2): divergent modulating effects on body mass index in obese and lean Caucasian men. *Diabetologia.* 1999 Jul;42(7):892-5.
- Evans D, Mann WA, de Heer J, Michel U, Wendt D, Kortner B, Wolf A, Beisiegel U. Variation in the gene for human peroxisome proliferator activated receptor gamma (PPARgamma) does not play a major role in the development of morbid obesity. *Int J Obes Relat Metab Disord.* 2000 May;24(5):647-51.
- Evans D, de Heer J, Hagemann C, Wendt D, Wolf A, Beisiegel U, Mann WA. Association between the P12A and c1431t polymorphisms in the peroxisome proliferator activated

- receptor gamma (PPAR gamma) gene and type 2 diabetes. *Exp Clin Endocrinol Diabetes*. 2001;109(3):151-4.
- Evans D, Wolf AM, Nellessen U, Ahle S, Kortner B, Kuhlmann HW, Beisiegel U. Association between polymorphisms in candidate genes and morbid obesity. *Int J Obes Relat Metab Disord*. 2001 May;25 Suppl 1:S19-21.
- Fornage M, Jacobs DR, Steffes MW, Gross MD, Bray MS, Schreiner PJ. Inverse effects of the PPAR(gamma)2 Pro12Ala polymorphism on measures of adiposity over 15 years in African Americans and whites. The CARDIA study. *Metabolism*. 2005 Jul;54(7):910-7.
- Frederiksen L, Brødbæk K, Fenger M, Jørgensen T, Borch-Johnsen K, Madsbad S, Urhammer SA. Comment: studies of the Pro12Ala polymorphism of the PPAR-gamma gene in the Danish MONICA cohort: homozygosity of the Ala allele confers a decreased risk of the insulin resistance syndrome. *J Clin Endocrinol Metab*. 2002 Aug;87(8):3989-92.
- Ghossaini M, Meyre D, Lobbens S, Charpentier G, Clément K, Charles MA, Tauber M, Weill J, Froguel P. Implication of the Pro12Ala polymorphism of the PPAR-gamma 2 gene in type 2 diabetes and obesity in the French population. *BMC Med Genet*. 2005 Mar 22;6:11.
- Gonzalez Sanchez JL, Serrano Rios M, Fernandez Perez C, Laakso M, Martinez Larrad MT. Effect of the Pro12Ala polymorphism of the peroxisome proliferator-activated receptor gamma-2 gene on adiposity, insulin sensitivity and lipid profile in the Spanish population. *Eur J Endocrinol* 2002 147: 495-501.
- Hamann A, Münzberg H, Buttron P, Büsing B, Hinney A, Mayer H, Siegfried W, Hebebrand J, Greten H. Missense variants in the human peroxisome proliferator-activated receptor-gamma2 gene in lean and obese subjects. *Eur J Endocrinol*. 1999 Jul;141(1):90-2.

Hara K, Okada T, Tobe K, Yasuda K, Mori Y, Kadowaki H, Hagura R, Akanuma Y, Kimura S, Ito C, Kadowaki T. The Pro12Ala polymorphism in PPAR gamma2 may confer resistance to type 2 diabetes. *Biochem Biophys Res Commun.* 2000 Apr 29;271(1):212-6.

Hasstedt SJ, Ren QF, Teng K, Elbein SC. Effect of the peroxisome proliferator-activated receptor-gamma 2 pro(12)ala variant on obesity, glucose homeostasis, and blood pressure in members of familial type 2 diabetic kindreds. *J Clin Endocrinol Metab.* 2001 Feb;86(2):536-41.

Hegele RA, Cao H, Harris SB, Zinman B, Hanley AJ, Anderson CM. Peroxisome proliferator-activated receptor-gamma2 P12A and type 2 diabetes in Canadian Oji-Cree. *J Clin Endocrinol Metab.* 2000 May;85(5):2014-9.

Herrmann SM, Ringel J, Wang JG, Staessen JA, Brand E; Berlin Diabetes Mellitus (BeDiaM) Study. Peroxisome proliferator-activated receptor-gamma2 polymorphism Pro12Ala is associated with nephropathy in type 2 diabetes: The Berlin Diabetes Mellitus (BeDiaM) Study. *Diabetes.* 2002 Aug;51(8):2653-7.

Horiki M, Ikegami H, Fujisawa T, Kawabata Y, Ono M, Nishino M, Shimamoto K, Ogihara T. Association of Pro12Ala polymorphism of PPARgamma gene with insulin resistance and related diseases. *Diabetes Res Clin Pract.* 2004 Dec;66 Suppl 1:S63-7.

Kahara T, Takamura T, Hayakawa T, Nagai Y, Yamaguchi H, Katsuki T, Katsuki K, Katsuki M, Kobayashi K. PPARgamma gene polymorphism is associated with exercise-mediated changes of insulin resistance in healthy men. *Metabolism.* 2003 Feb;52(2):209-12.

Kao WH, Coresh J, Shuldiner AR, Boerwinkle E, Bray MS, Brancati FL. Pro12Ala of the peroxisome proliferator-activated receptor-gamma2 gene is associated with lower serum

- insulin levels in nonobese African Americans: the Atherosclerosis Risk in Communities Study. *Diabetes*. 2003 Jun;52(6):1568-72.
- Kawasaki I, Tahara H, Emoto M, Shoji T, Shioji A, Okuno Y, Inaba M, Nishizawa Y. Impact of Pro12Ala variant in the peroxisome proliferator-activated receptor (PPAR) gamma2 on obesity and insulin resistance in Japanese Type 2 diabetic and healthy subjects. *Osaka City Med J*. 2002 Jun;48(1):23-8.
- Kim KS, Choi SM, Shin SU, Yang HS, Yoon Y. Effects of peroxisome proliferator-activated receptor-gamma 2 Pro12Ala polymorphism on body fat distribution in female Korean subjects. *Metabolism*. 2004 Dec;53(12):1538-43.
- Koch M, Rett K, Maerker E, Volk A, Haist K, Deninger M, Renn W, Häring HU. The PPARgamma2 amino acid polymorphism Pro 12 Ala is prevalent in offspring of Type II diabetic patients and is associated to increased insulin sensitivity in a subgroup of obese subjects. *Diabetologia*. 1999 Jun;42(6):758-62.
- Lei HH, Chen MH, Yang WS, Chiu MC, Chen MC, Tai TY, Chuang LM. Peroxisome proliferator-activated receptor gamma 2 Pro12Ala gene variant is strongly associated with larger body mass in the Taiwanese. *Metabolism*. 2000 Oct;49(10):1267-70.
- Li S, Chen W, Srinivasan SR, Boerwinkle E, Berenson GS; The Bogalusa Heart Study. The peroxisome proliferator-activated receptor-gamma2 gene polymorphism (Pro12Ala) beneficially influences insulin resistance and its tracking from childhood to adulthood: the Bogalusa Heart Study. *Diabetes*. 2003 May;52(5):1265-9.
- Li WD, Lee JH, Price RA. The peroxisome proliferator-activated receptor gamma 2 Pro12Ala mutation is associated with early onset extreme obesity and reduced fasting glucose. *Mol Genet Metab*. 2000 Jun;70(2):159-61.

- Lindi VI, Uusitupa MI, Lindström J, Louheranta A, Eriksson JG, Valle TT, Hämäläinen H, Ilanne-Parikka P, Keinänen-Kiukaanniemi S, Laakso M, Tuomilehto J; Finnish Diabetes Prevention Study. Association of the Pro12Ala polymorphism in the PPAR-gamma2 gene with 3-year incidence of type 2 diabetes and body weight change in the Finnish Diabetes Prevention Study. *Diabetes*. 2002 Aug;51(8):2581-6.
- Luan J, Browne PO, Harding AH, Halsall DJ, O'Rahilly S, Chatterjee VK, Wareham NJ. Evidence for gene-nutrient interaction at the PPARgamma locus. *Diabetes*. 2001 Mar;50(3):686-9.
- Malczewska-Malec M, Wybranska I, Leszczynska-Golabek I, Partyka L, Hartwich J, Jabrocka A, Kiec-Wilk B, Kwasniak M, Motyka M, Dembinska-Kiec A. Analysis of candidate genes in Polish families with obesity. *Clin Chem Lab Med*. 2004 May;42(5):487-93.
- Malecki MT, Frey J, Klupa T, Skupien J, Walus M, Mlynarski W, Sieradzki J. The Pro12Ala polymorphism of PPARgamma2 gene and susceptibility to type 2 diabetes mellitus in a Polish population. *Diabetes Res Clin Pract*. 2003 Nov;62(2):105-11.
- Mancini FP, Vaccaro O, Sabatino L, Tufano A, Rivellese AA, Riccardi G, Colantuoni V. Pro12Ala substitution in the peroxisome proliferator-activated receptor-gamma2 is not associated with type 2 diabetes. *Diabetes*. 1999 Jul;48(7):1466-8.
- Masud S, Ye S; SAS Group. Effect of the peroxisome proliferator activated receptor-gamma gene Pro12Ala variant on body mass index: a meta-analysis. *J Med Genet*. 2003 Oct;40(10):773-80.
- Meirhaeghe A, Fajas L, Helbecque N, Cottel D, Auwerx J, Deeb SS, Amouyel P. Impact of the Peroxisome Proliferator Activated Receptor gamma2 Pro12Ala polymorphism on



- adiposity, lipids and non-insulin-dependent diabetes mellitus. *Int J Obes Relat Metab Disord.* 2000 Feb;24(2):195-9.
- Meirhaeghe A, Fajas L, Helbecque N, Cottel D, Lebel P, Dallongeville J, Deeb S, Auwerx J, Amouyel P. A genetic polymorphism of the peroxisome proliferator-activated receptor gamma gene influences plasma leptin levels in obese humans. *Hum Mol Genet.* 1998 Mar;7(3):435-40.
- Memisoglu A, Hu FB, Hankinson SE, Manson JE, De Vivo I, Willett WC, Hunter DJ. Interaction between a peroxisome proliferator-activated receptor gamma gene polymorphism and dietary fat intake in relation to body mass. *Hum Mol Genet.* 2003 Nov 15;12(22):2923-9. Epub 2003 Sep 23.
- Memisoglu A, Hu FB, Hankinson SE, Liu S, Meigs JB, Altshuler DM, Hunter DJ, Manson JE. Prospective study of the association between the proline to alanine codon 12 polymorphism in the PPARgamma gene and type 2 diabetes. *Diabetes Care.* 2003 Oct;26(10):2915-7.
- Mori H, Ikegami H, Kawaguchi Y, Seino S, Yokoi N, Takeda J, Inoue I, Seino Y, Yasuda K, Hanafusa T, Yamagata K, Awata T, Kadowaki T, Hara K, Yamada N, Gotoda T, Iwasaki N, Iwamoto Y, Sanke T, Nanjo K, Oka Y, Matsutani A, Maeda E, Kasuga M. The Pro12-->Ala substitution in PPAR-gamma is associated with resistance to development of diabetes in the general population: possible involvement in impairment of insulin secretion in individuals with type 2 diabetes. *Diabetes.* 2001 Apr;50(4):891-4.
- Mori Y, Kim-Motoyama H, Katakura T, Yasuda K, Kadowaki H, Beamer BA, Shuldiner AR, Akanuma Y, Yazaki Y, Kadowaki T. Effect of the Pro12Ala variant of the human peroxisome proliferator-activated receptor gamma 2 gene on adiposity, fat distribution,

- and insulin sensitivity in Japanese men. *Biochem Biophys Res Commun.* 1998 Oct 9;251(1):195-8.
- Muller YL, Bogardus C, Beamer BA, Shuldiner AR, Baier LJ. A functional variant in the peroxisome proliferator-activated receptor gamma2 promoter is associated with predictors of obesity and type 2 diabetes in Pima Indians. *Diabetes.* 2003 Jul;52(7):1864-71.
- Nemoto M, Sasaki T, Deeb SS, Fujimoto WY, Tajima N. Differential effect of PPARgamma2 variants in the development of type 2 diabetes between native Japanese and Japanese Americans. *Diabetes Res Clin Pract.* 2002 Aug;57(2):131-7.
- Niskanen L, Lindi V, Erkkilä A, Sivenius K, Luoma J, Ylä-Herttuala S, Laakso M, Uusitupa MI. Association of the PRO12ALA polymorphism of the PPAR-gamma2 gene with oxidized low-density lipoprotein and cardioplipin autoantibodies in nondiabetic and type 2 diabetic subjects. *Metabolism.* 2003 Feb;52(2):213-7.
- Ochoa MC, Marti A, Azcona C, Chueca M, Oyarzábal M, Pelach R, Patiño A, Moreno-Aliaga MJ, Martínez-González MA, Martínez JA; Grupo de Estudio Navarro de Obesidad Infantil (GENOI). Gene-gene interaction between PPAR gamma 2 and ADR beta 3 increases obesity risk in children and adolescents. *Int J Obes Relat Metab Disord.* 2004 Nov;28 Suppl 3:S37-41.
- Oh EY, Min KM, Chung JH, Min YK, Lee MS, Kim KW, Lee MK. Significance of Pro12Ala mutation in peroxisome proliferator-activated receptor-gamma2 in Korean diabetic and obese subjects. *J Clin Endocrinol Metab.* 2000 May;85(5):1801-4.
- Østergård T, Ek J, Hamid Y, Saltin B, Pedersen OB, Hansen T, Schmitz O. Influence of the PPAR-gamma2 Pro12Ala and ACE I/D polymorphisms on insulin sensitivity and training

- effects in healthy offspring of type 2 diabetic subjects. *Horm Metab Res.* 2005 Feb;37(2):99-105.
- Pihlajamäki J, Vanhala M, Vanhala P, Laakso M. The Pro12Ala polymorphism of the PPAR gamma 2 gene regulates weight from birth to adulthood. *Obes Res.* 2004 Feb;12(2):187-90.
- Pintérová D, Cerná M, Kolostová K, Novota P, Cimburová M, Romzová M, Kubena A, Anđel M. The frequency of alleles of the Pro12Ala polymorphism in PPARgamma2 is different between healthy controls and patients with type 2 diabetes. *Folia Biol (Praha).* 2004;50(5):153-6.
- Pisabarro RE, Sanguinetti C, Stoll M, Prendez D. High incidence of type 2 diabetes in peroxisome proliferator-activated receptor gamma2 Pro12Ala carriers exposed to a high chronic intake of trans fatty acids and saturated fatty acids. *Diabetes Care.* 2004 Sep;27(9):2251-2.
- Poulsen P, Andersen G, Fenger M, Hansen T, Echwald SM, Vølund A, Beck-Nielsen H, Pedersen O, Vaag A. Impact of two common polymorphisms in the PPARgamma gene on glucose tolerance and plasma insulin profiles in monozygotic and dizygotic twins: thrifty genotype, thrifty phenotype, or both? *Diabetes.* 2003 Jan;52(1):194-8.
- Ringel J, Engeli S, Distler A, Sharma AM. Pro12Ala missense mutation of the peroxisome proliferator activated receptor gamma and diabetes mellitus. *Biochem Biophys Res Commun.* 1999 Jan 19;254(2):450-3.
- Rosmond R, Chagnon M, Bouchard C. The Pro12Ala PPARgamma2 gene missense mutation is associated with obesity and insulin resistance in Swedish middle-aged men. *Diabetes Metab Res Rev.* 2003 Mar-Apr;19(2):159-63.

- Schäffler A, Barth N, Schmitz G, Zietz B, Palitzsch KD, Schölmerich J. Frequency and significance of Pro12Ala and Pro115Gln polymorphism in gene for peroxisome proliferation-activated receptor-gamma regarding metabolic parameters in a Caucasian cohort. *Endocrine*. 2001 Apr;14(3):369-73.
- Shaat N, Ekelund M, Lernmark A, Ivarsson S, Nilsson A, Perfekt R, Berntorp K, Groop L. Genotypic and phenotypic differences between Arabian and Scandinavian women with gestational diabetes mellitus. *Diabetologia*. 2004 May;47(5):878-84. Epub 2004 Apr 17.
- Simón I, Vendrell J, Gutiérrez C, Fernández-Real JM, Vendrell I, Gallart L, Fontova R, Richart C. Pro12Ala substitution in the peroxisome proliferator-activated receptor-gamma is associated with increased leptin levels in women with type-2 diabetes mellitus. *Horm Res*. 2002;58(3):143-9.
- Srámková D, Kunesová M, Hainer V, Hill M, Vcelák J, Bendlová B. Is a Pro12Ala polymorphism of the PPARgamma2 gene related to obesity and type 2 diabetes mellitus in the Czech population? *Ann N Y Acad Sci*. 2002 Jun;967:265-73.
- Swarbrick MM, Chapman CM, McQuillan BM, Hung J, Thompson PL, Beilby JP. A Pro12Ala polymorphism in the human peroxisome proliferator-activated receptor-gamma 2 is associated with combined hyperlipidaemia in obesity. *Eur J Endocrinol*. 2001 Mar;144(3):277-82.
- Tai ES, Corella D, Deurenberg-Yap M, Adiconis X, Chew SK, Tan CE, Ordovas JM. Differential effects of the C1431T and Pro12Ala PPARgamma gene variants on plasma lipids and diabetes risk in an Asian population. *J Lipid Res*. 2004 Apr;45(4):674-85. Epub 2004 Jan 16.

- Takata N, Awata T, Inukai K, Watanabe M, Ohkubo T, Kurihara S, Inaba M, Katayama S.  
Pro12Ala substitution in peroxisome proliferator-activated receptor gamma 2 is associated with low adiponectin concentrations in young Japanese men. *Metabolism*. 2004 Dec;53(12):1548-51.
- Tavares V, Hirata RD, Rodrigues AC, Monte O, Salles JE, Scalissi N, Speranza AC, Hirata MH.  
Association between Pro12Ala polymorphism of the PPAR-gamma2 gene and insulin sensitivity in Brazilian patients with type-2 diabetes mellitus. *Diabetes Obes Metab*. 2005 Sep;7(5):605-11.
- Vaccaro O, Mancini FP, Ruffa G, Sabatino L, Colantuoni V, Riccardi G. Pro12Ala mutation in the peroxisome proliferator-activated receptor gamma2 (PPARgamma2) and severe obesity: a case-control study. *Int J Obes Relat Metab Disord*. 2000 Sep;24(9):1195-9.
- Vaccaro O, Mancini FP, Ruffa G, Sabatino L, Iovine C, Masulli M, Colantuoni V, Riccardi G.  
Fasting plasma free fatty acid concentrations and Pro12Ala polymorphism of the peroxisome proliferator-activated receptor (PPAR) gamma2 gene in healthy individuals. *Clin Endocrinol (Oxf)*. 2002 Oct;57(4):481-6.
- Valve R, Sivenius K, Miettinen R, Pihlajamäki J, Rissanen A, Deeb SS, Auwerx J, Uusitupa M, Laakso M. Two polymorphisms in the peroxisome proliferator-activated receptor-gamma gene are associated with severe overweight among obese women. *J Clin Endocrinol Metab*. 1999 Oct;84(10):3708-12.
- Vieira-Filho JP, Reis AF, Kasamatsu TS, Tavares EF, Franco LJ, Matioli SR, Moisés RS.  
Influence of the polymorphisms Tpr64Arg in the beta 3-adrenergic receptor gene and Pro12Ala in the PPAR gamma 2 gene on metabolic syndrome-related phenotypes in an indigenous population of the Brazilian Amazon. *Diabetes Care*. 2004 Feb;27(2):621-2.

- Vigouroux C, Fajas L, Khallouf E, Meier M, Gyapay G, Lascols O, Auwerx J, Weissenbach J, Capeau J, Magré J. Human peroxisome proliferator-activated receptor-gamma2: genetic mapping, identification of a variant in the coding sequence, and exclusion as the gene responsible for lipotrophic diabetes. *Diabetes*. 1998 Mar;47(3):490-2.
- Yamamoto Y, Hirose H, Miyashita K, Nishikai K, Saito I, Taniyama M, Tomita M, Saruta T. PPAR(gamma)2 gene Pro12Ala polymorphism may influence serum level of an adipocyte-derived protein, adiponectin, in the Japanese population. *Metabolism*. 2002 Nov;51(11):1407-9.
- Yen CJ, Beamer BA, Negri C, Silver K, Brown KA, Yarnall DP, Burns DK, Roth J, Shuldiner AR. Molecular scanning of the human peroxisome proliferator activated receptor gamma (hPPAR gamma) gene in diabetic Caucasians: identification of a Pro12Ala PPAR gamma 2 missense mutation. *Biochem Biophys Res Commun*. 1997 Dec 18;241(2):270-4.
